# Supplementary material
Source: publisher figshare collection journal article supplement (https://frontiersin.figshare.com/ndownloader/files/30917788)

### Gloworm output 2018-1985 Kibber

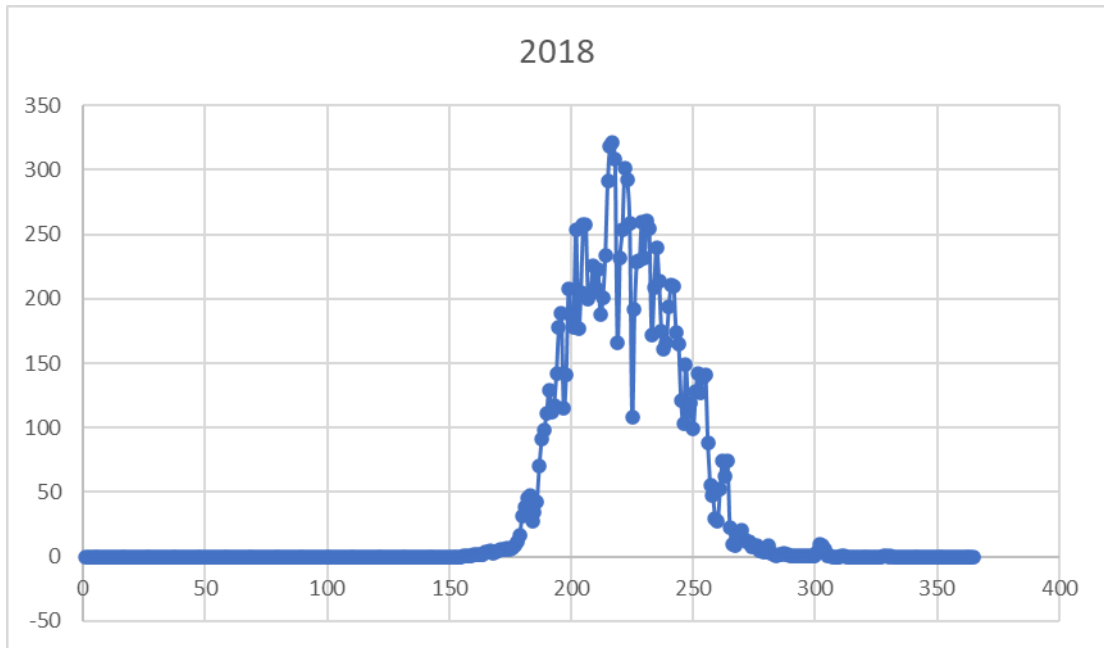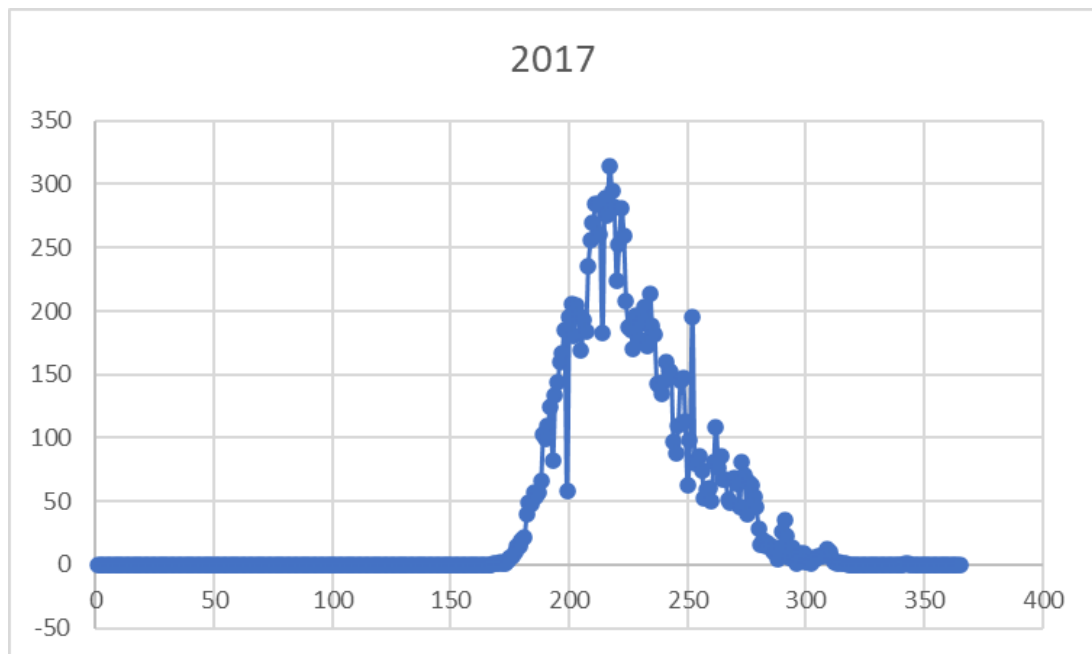

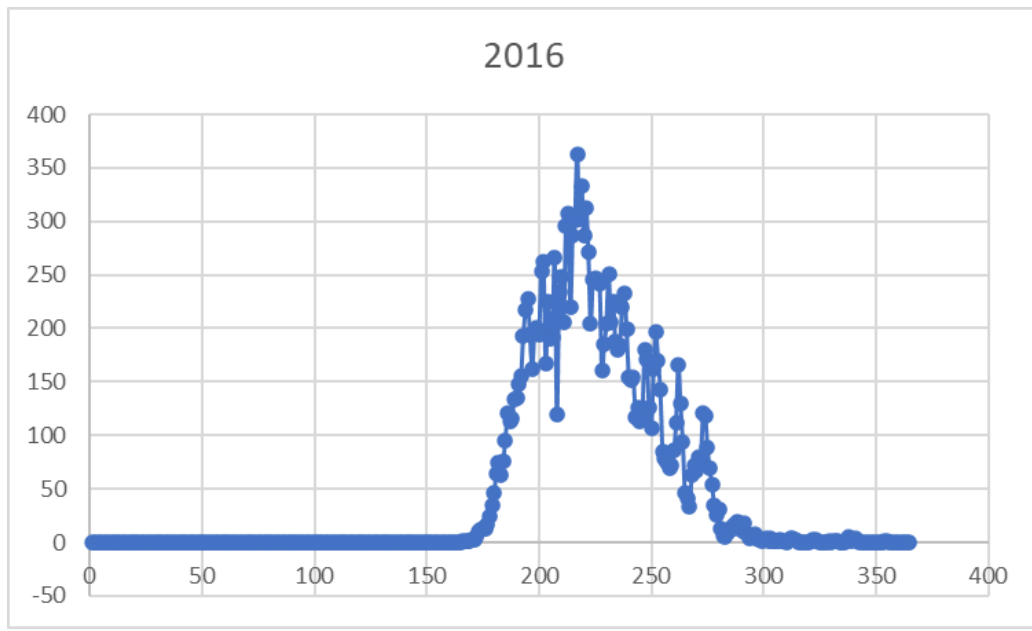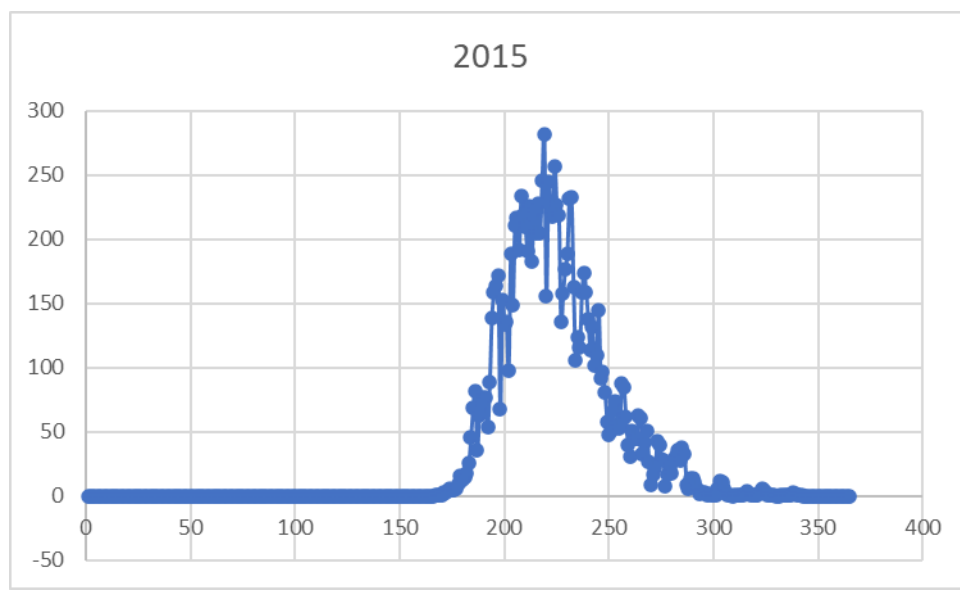

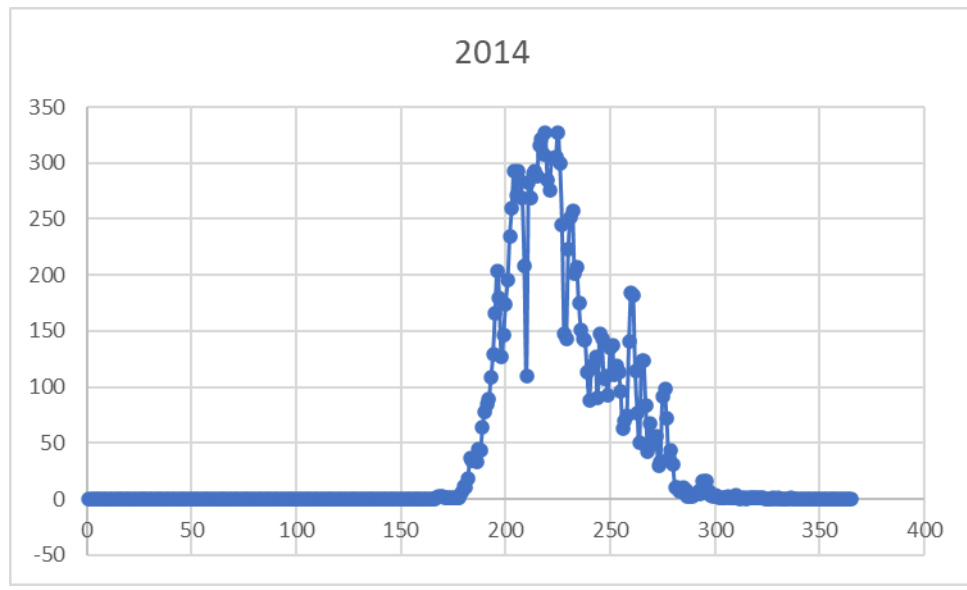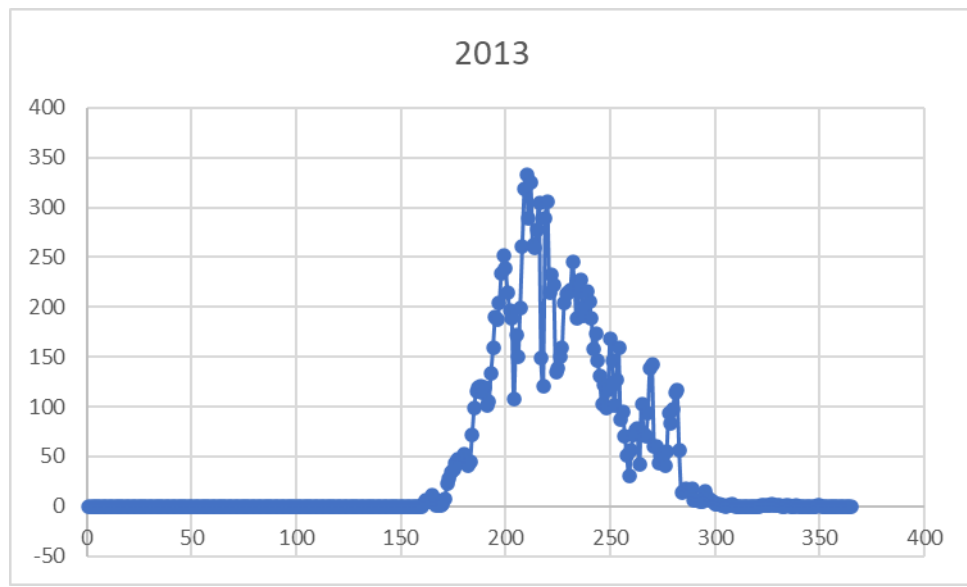

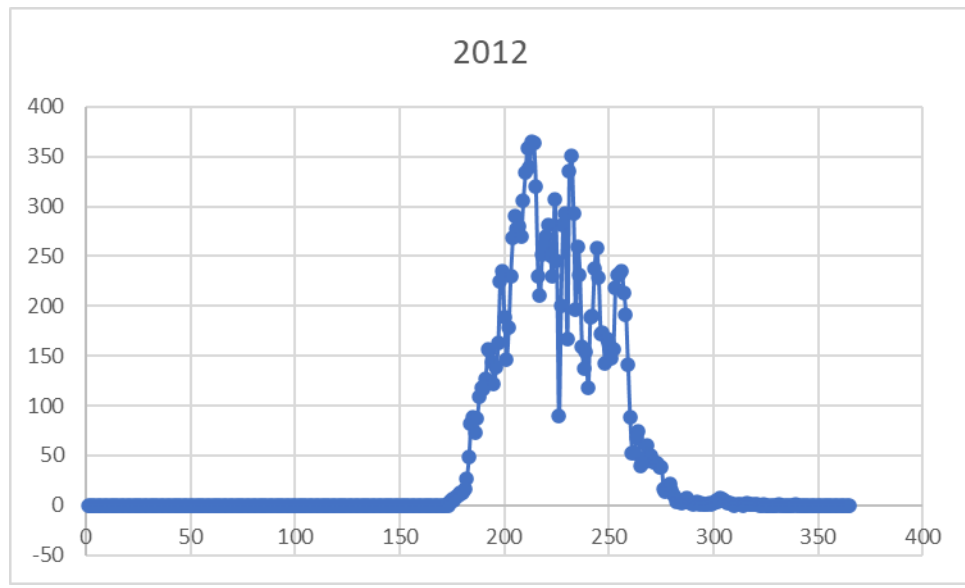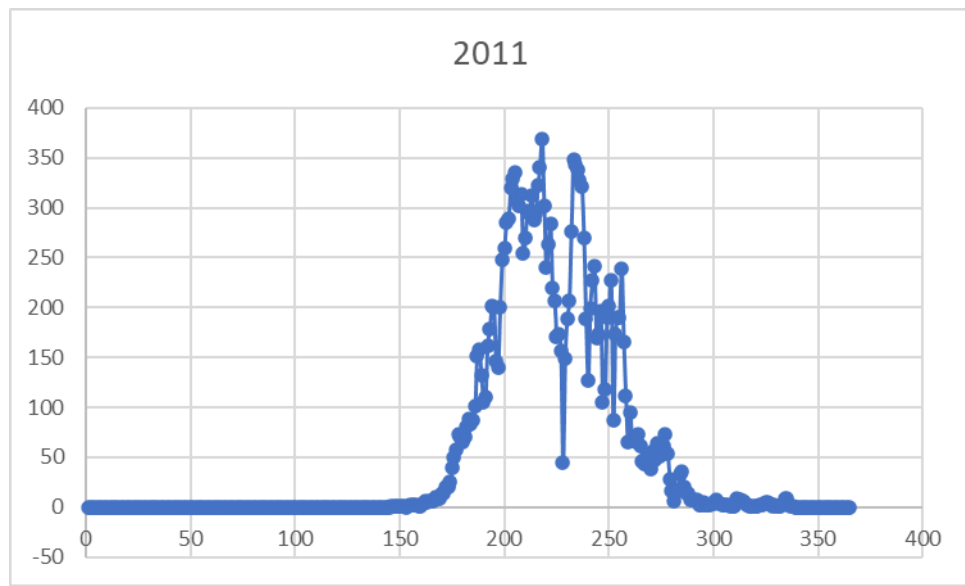

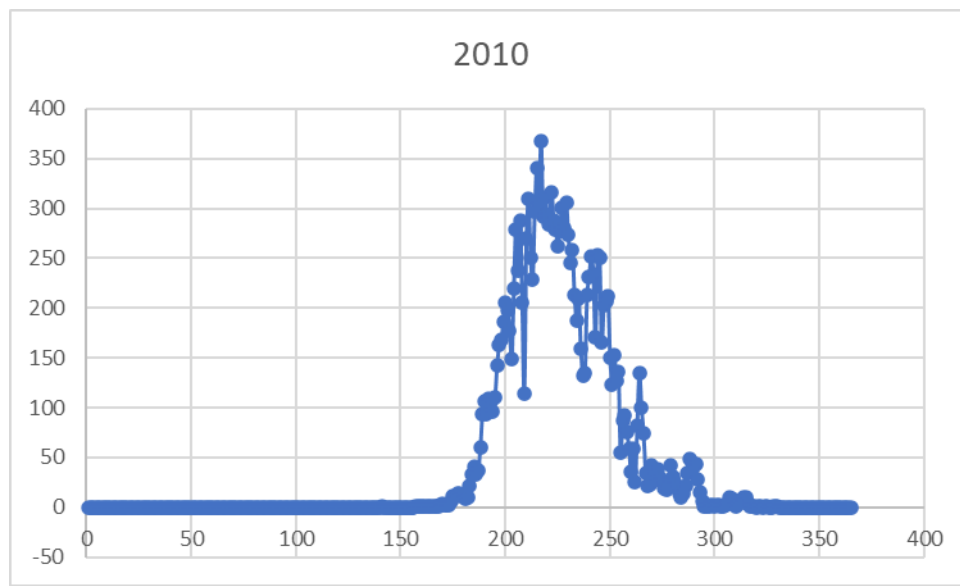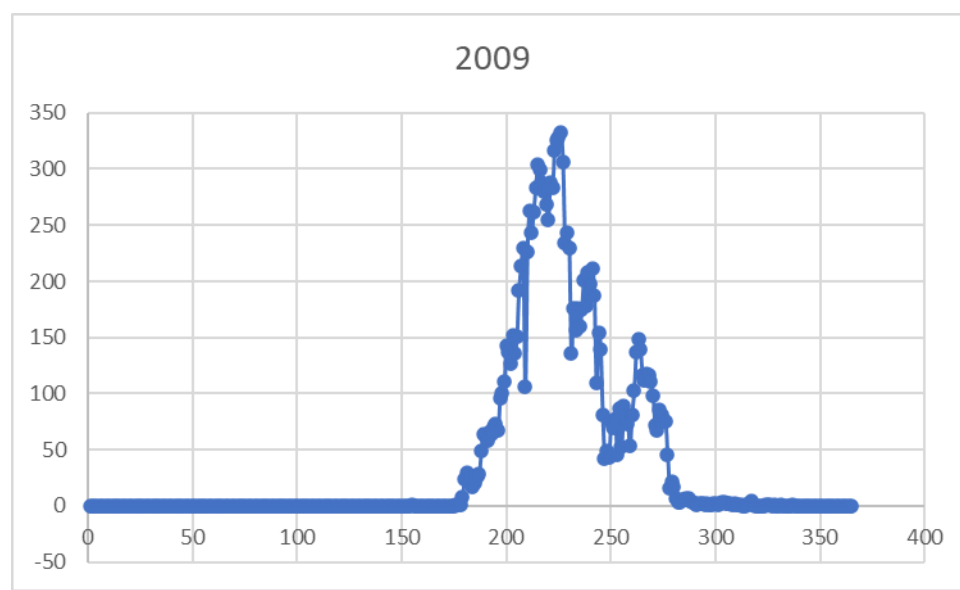

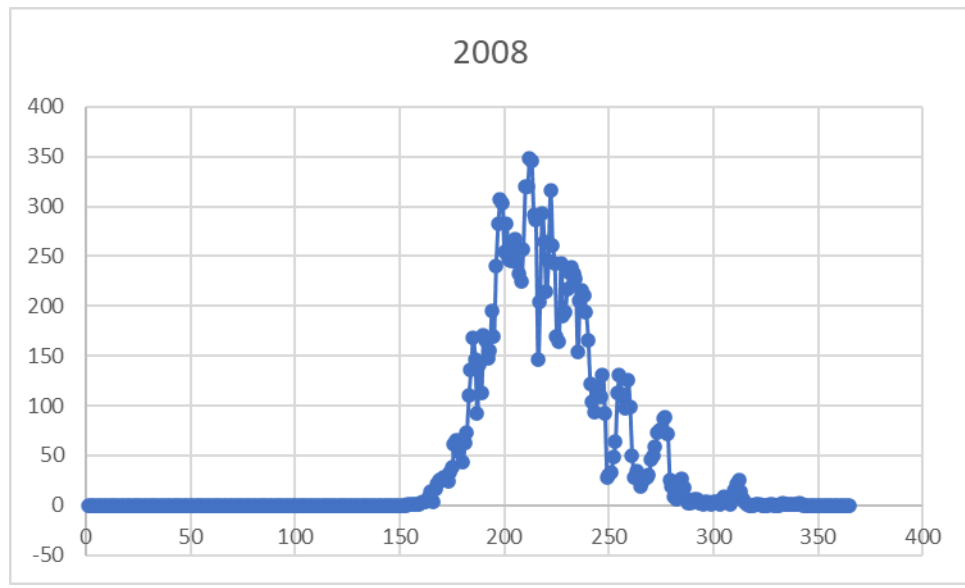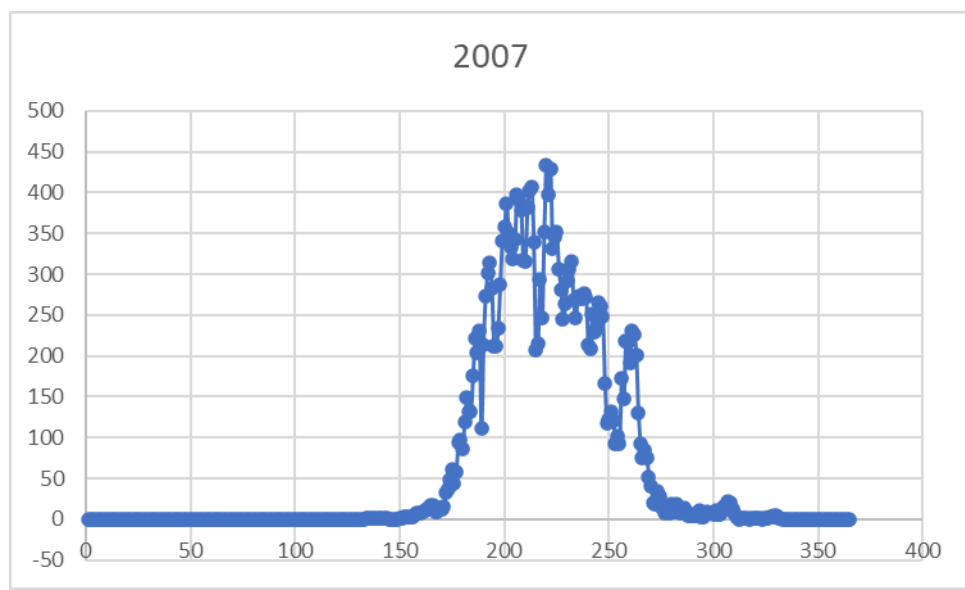

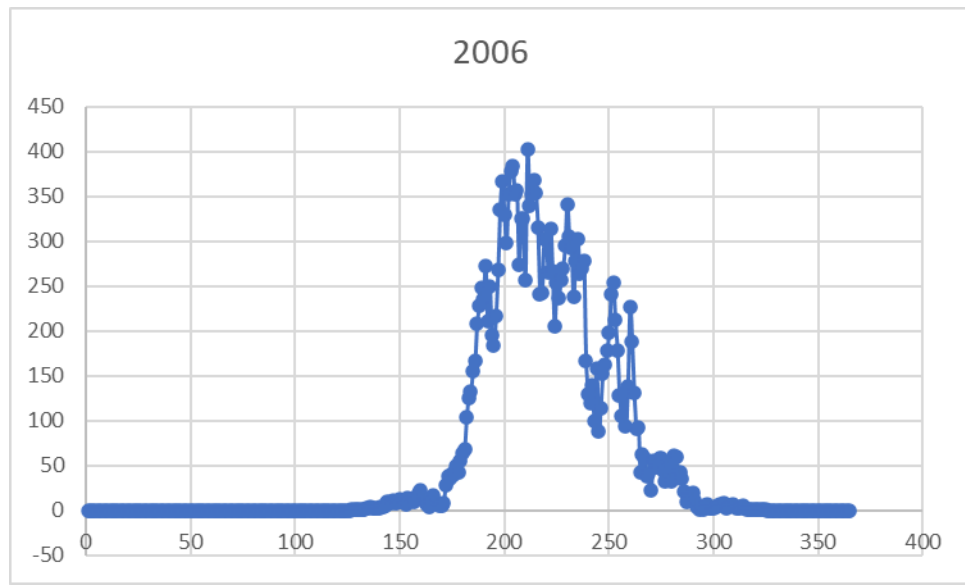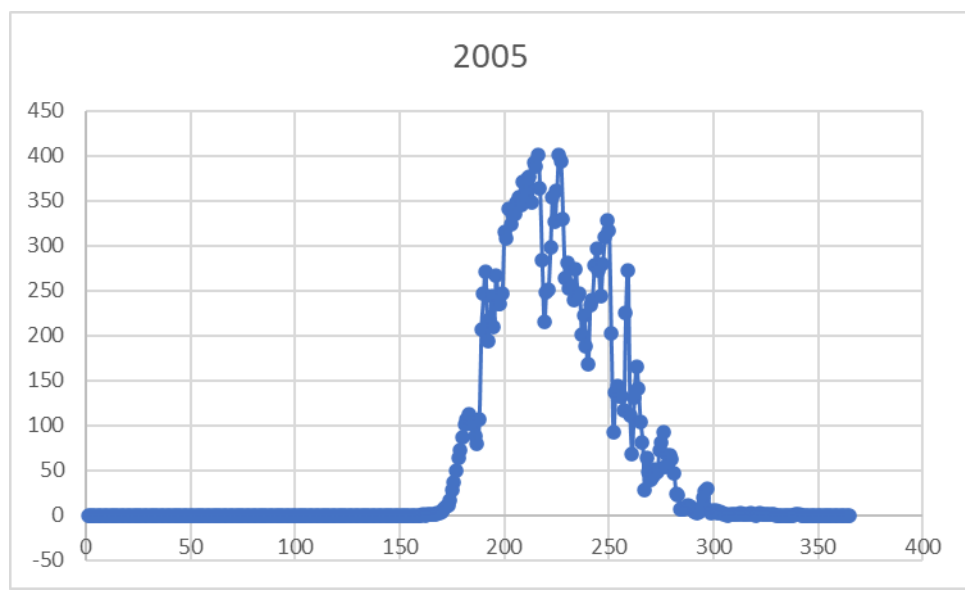

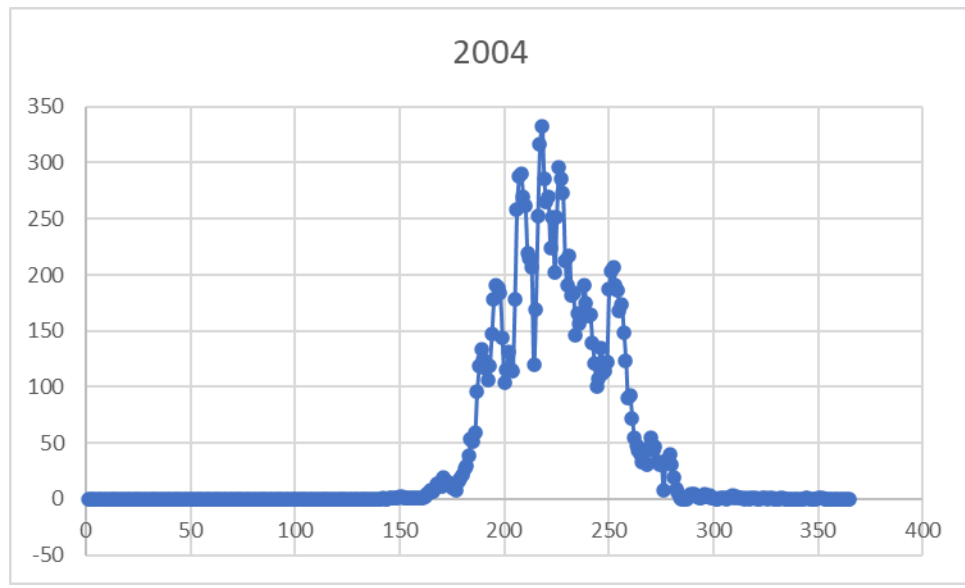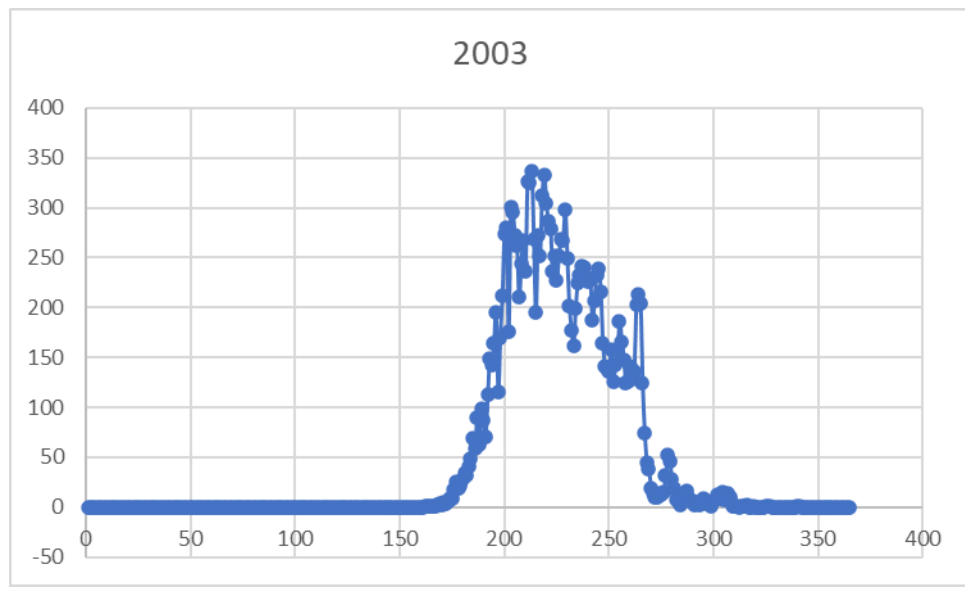



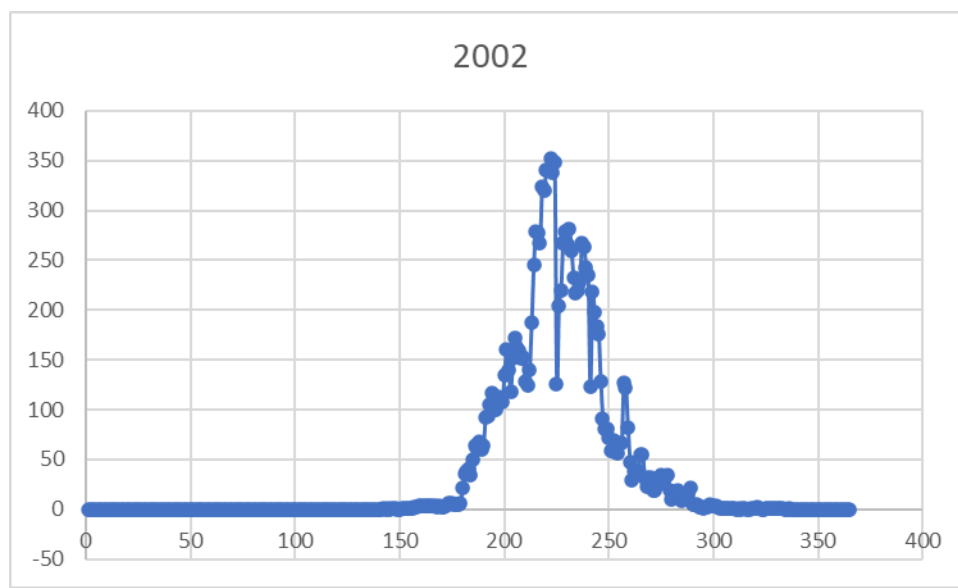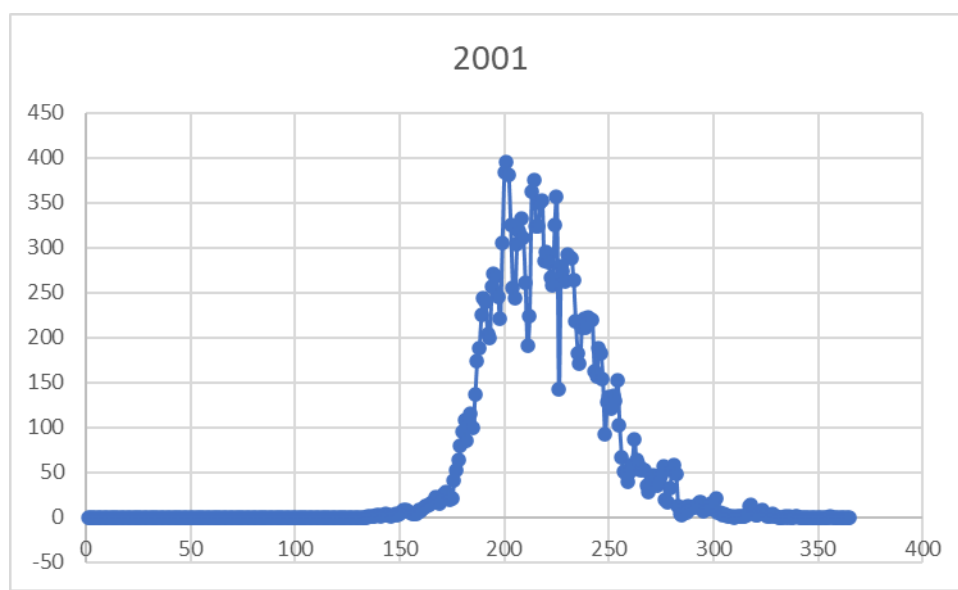

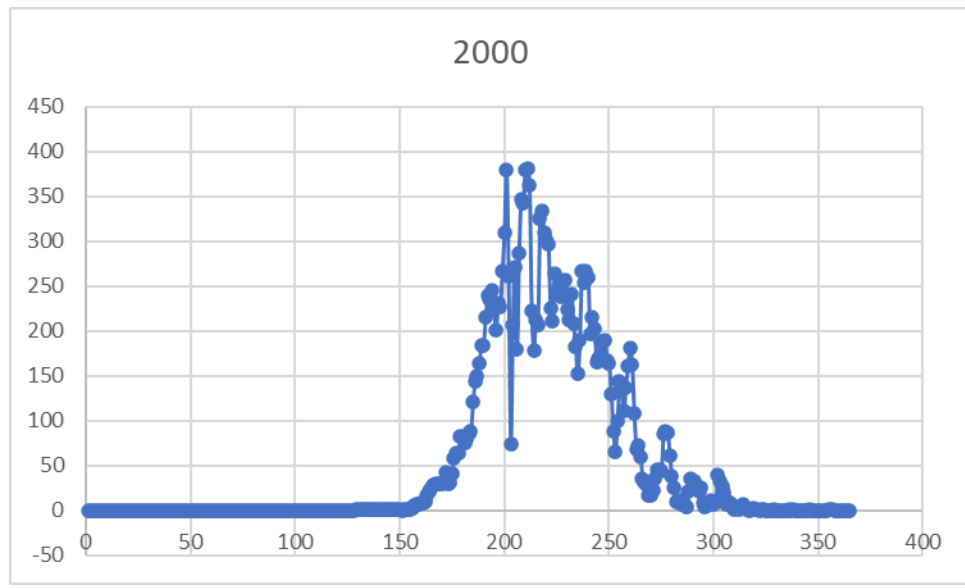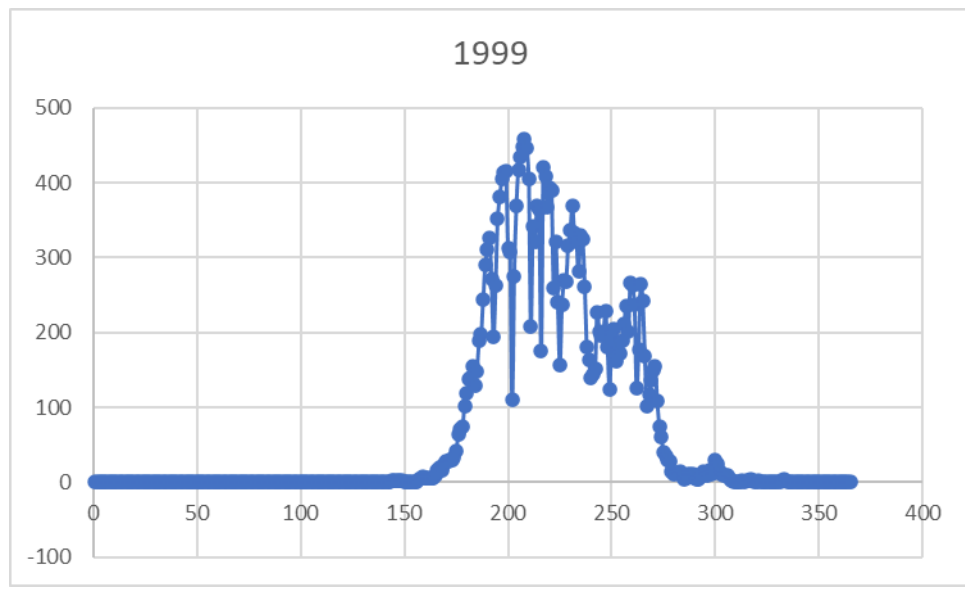

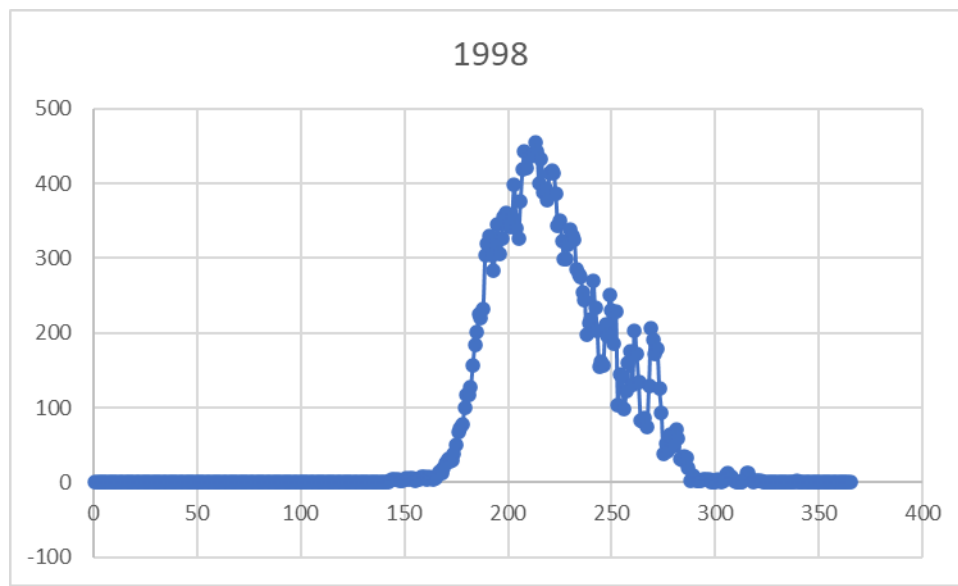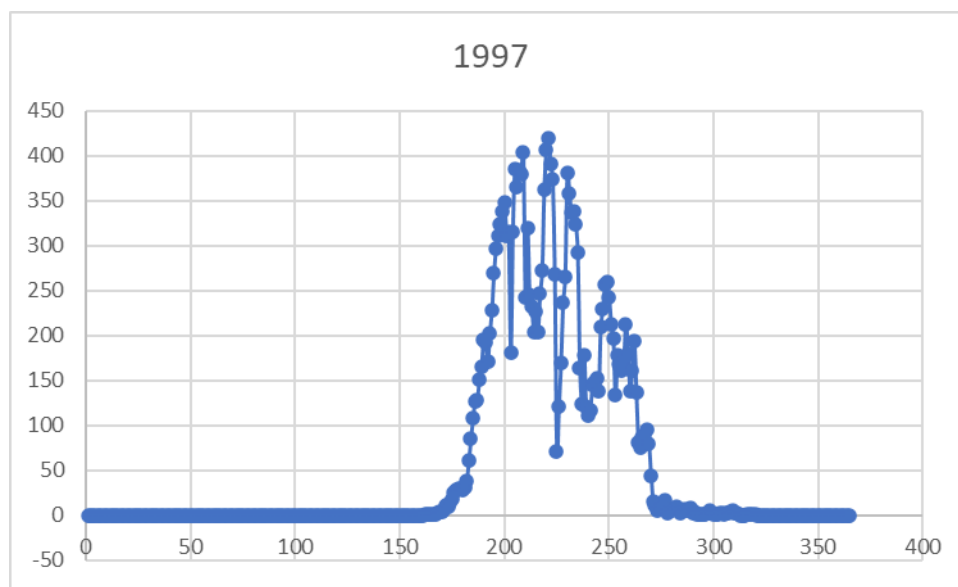

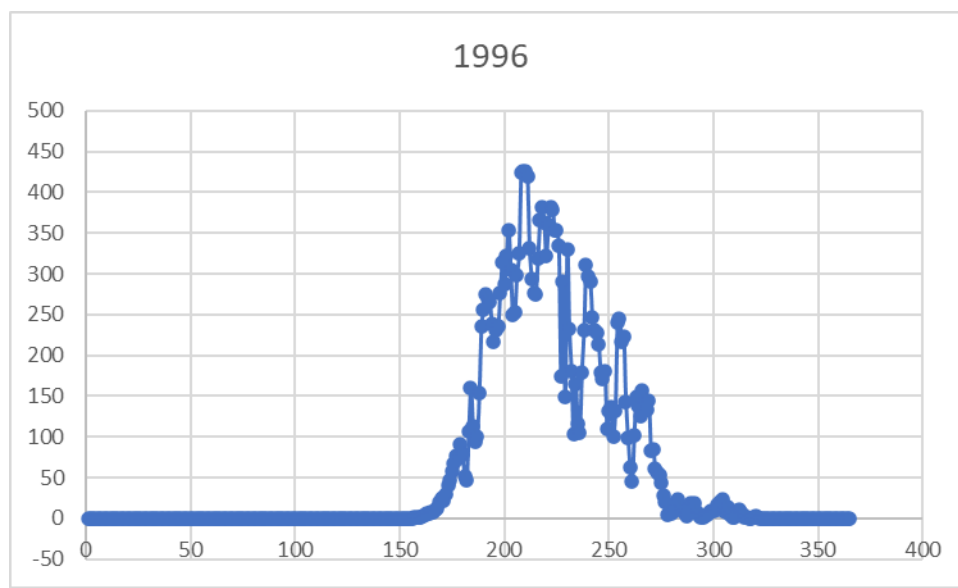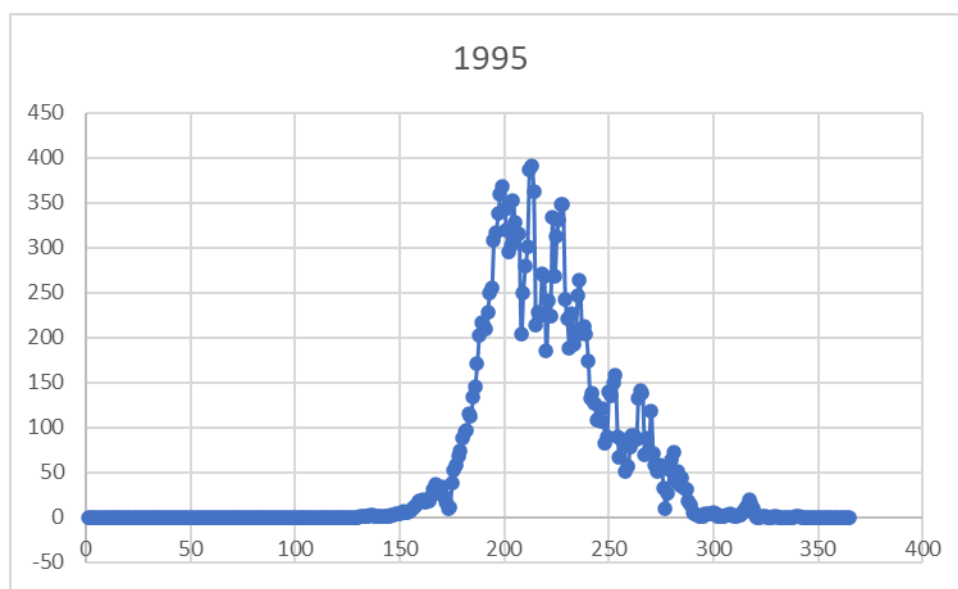

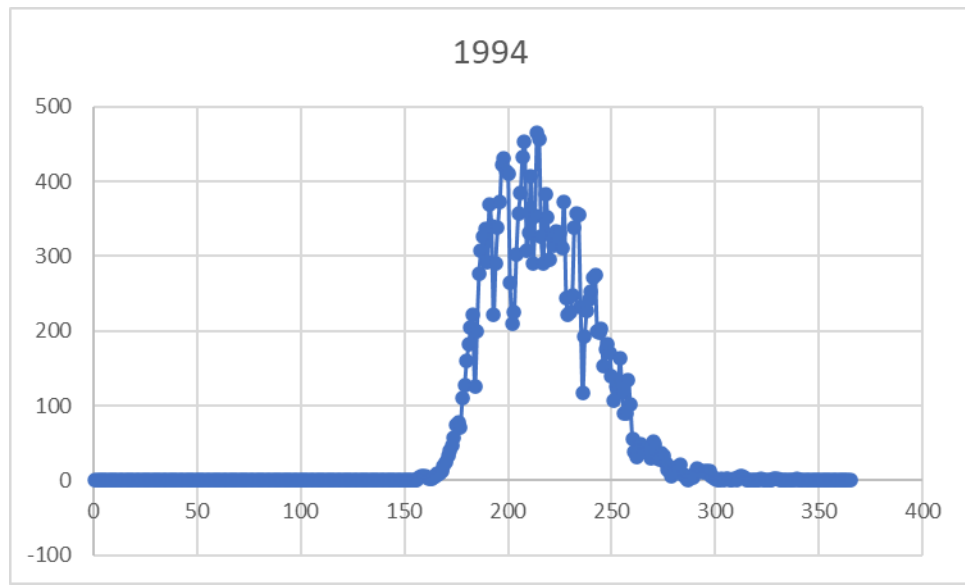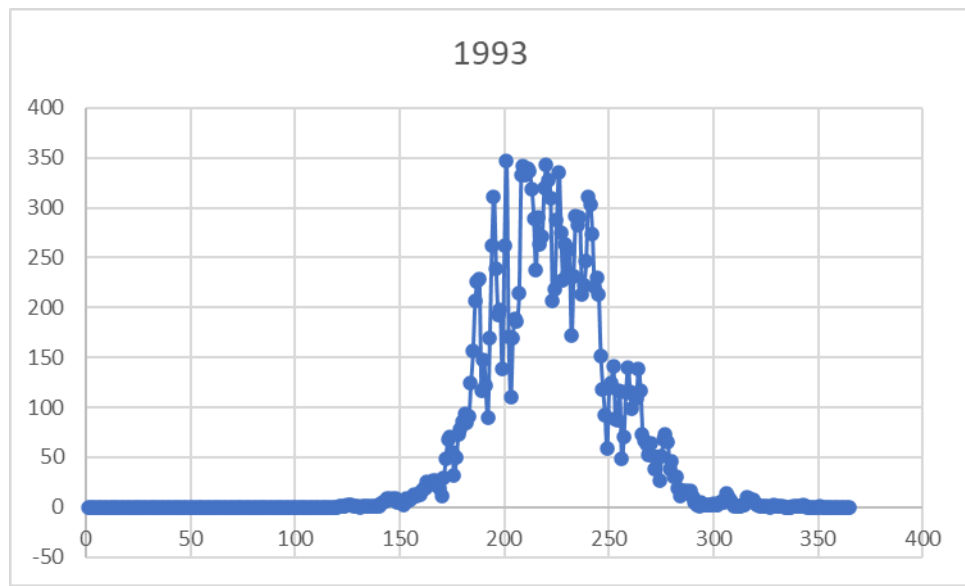

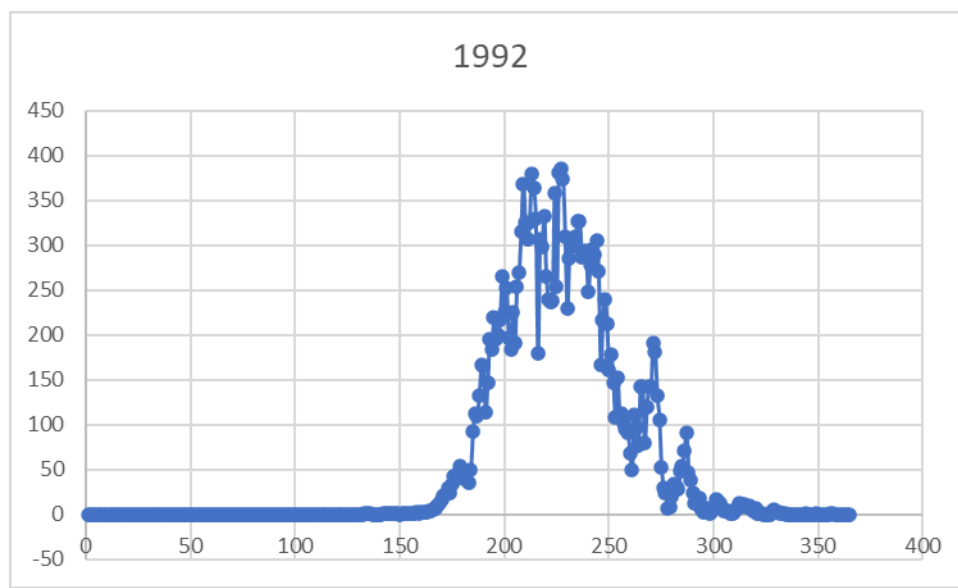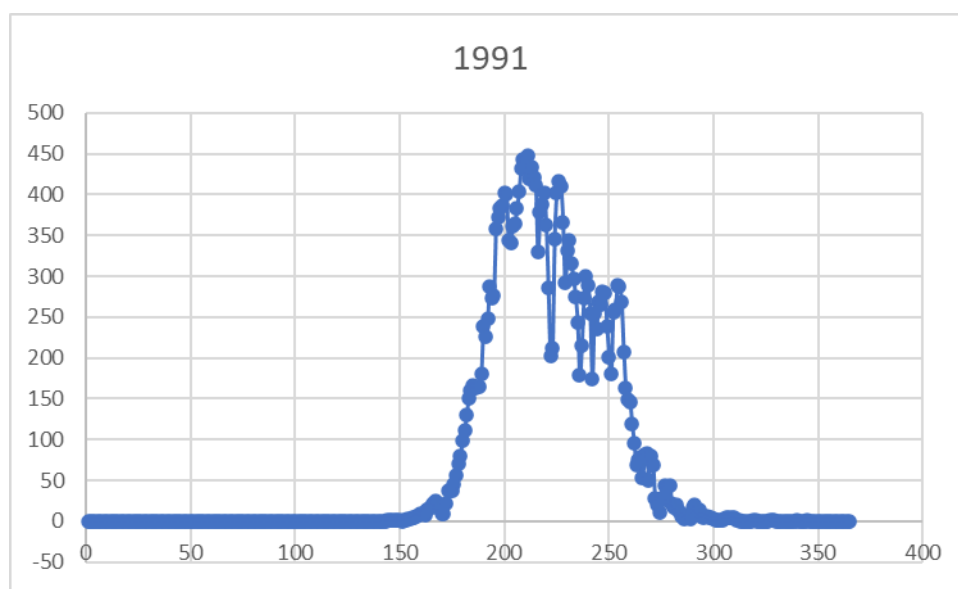

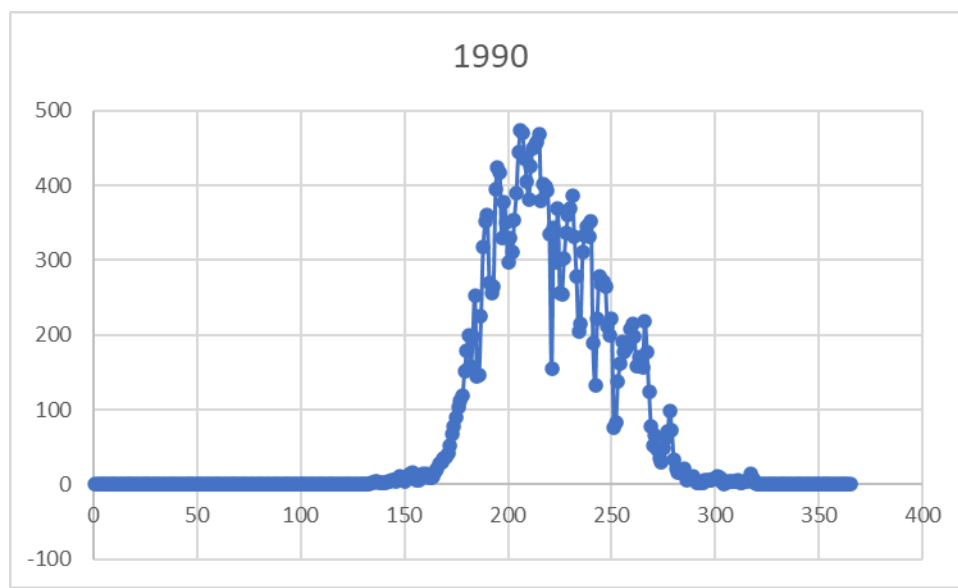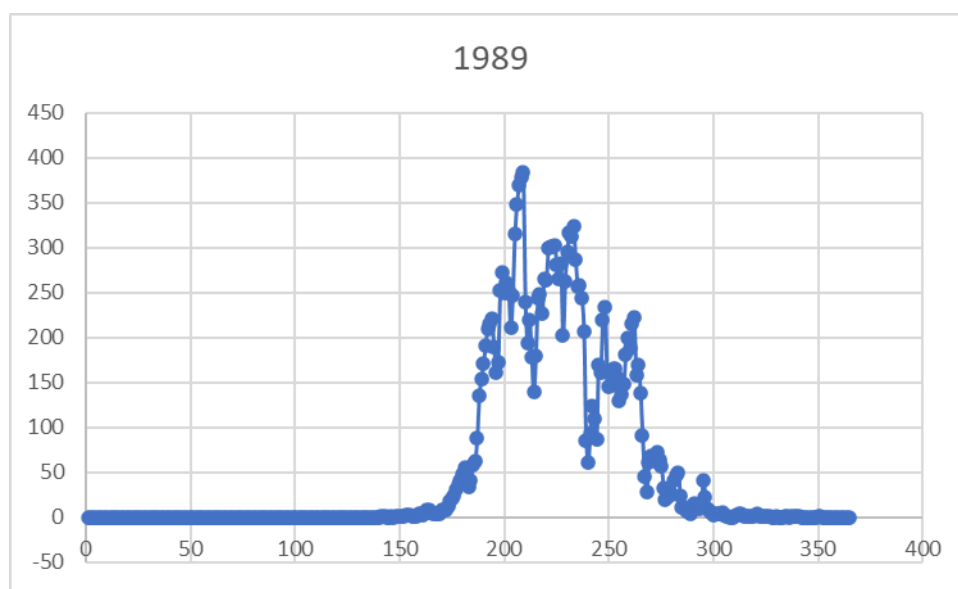

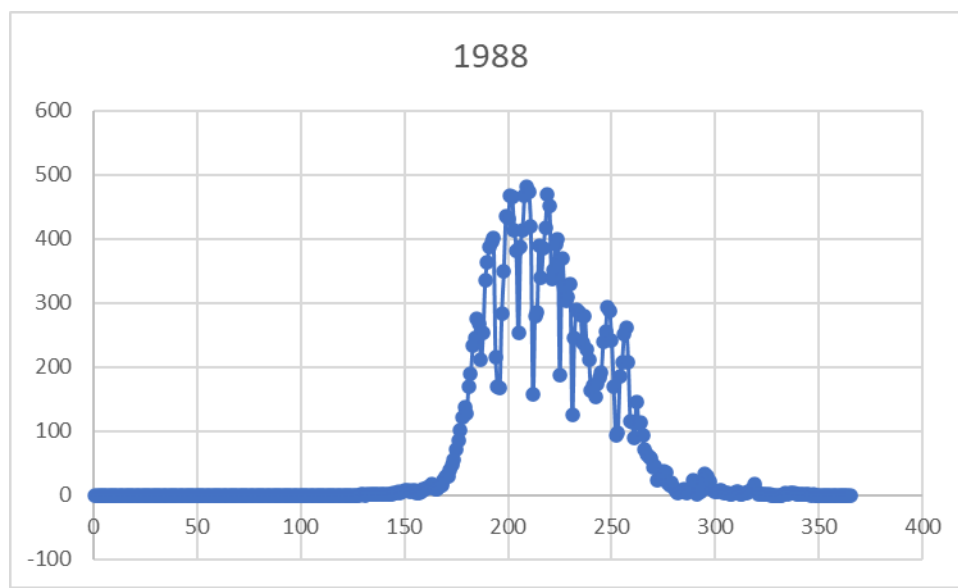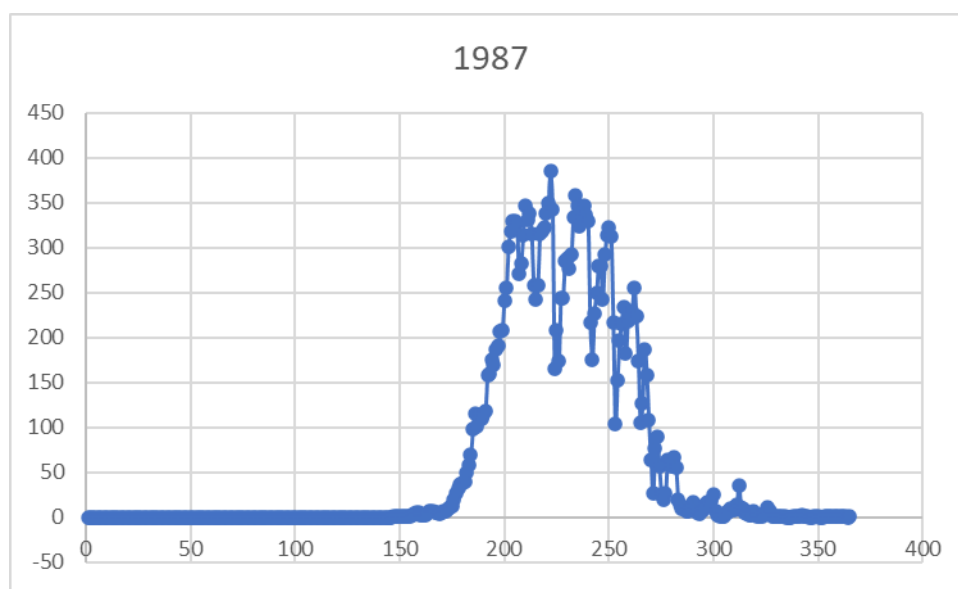



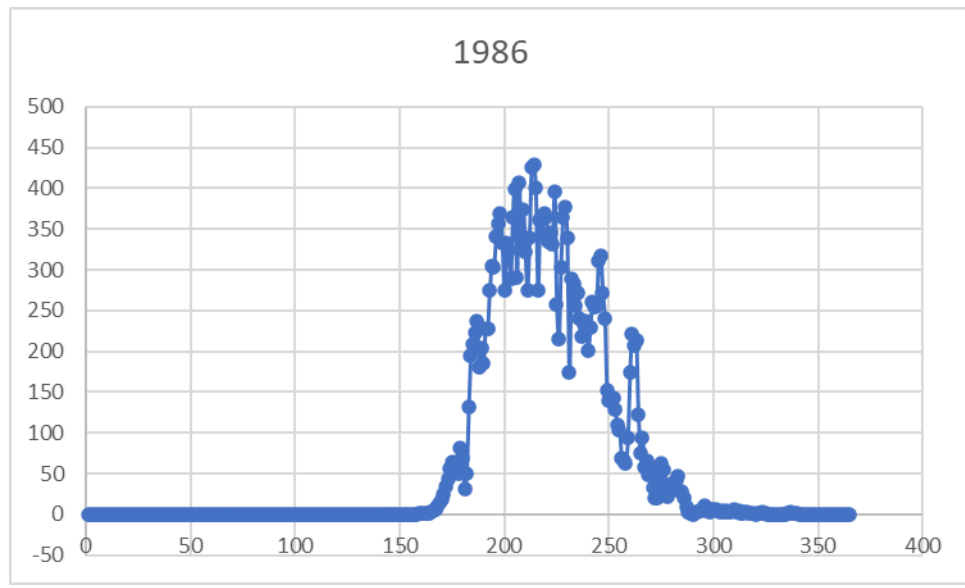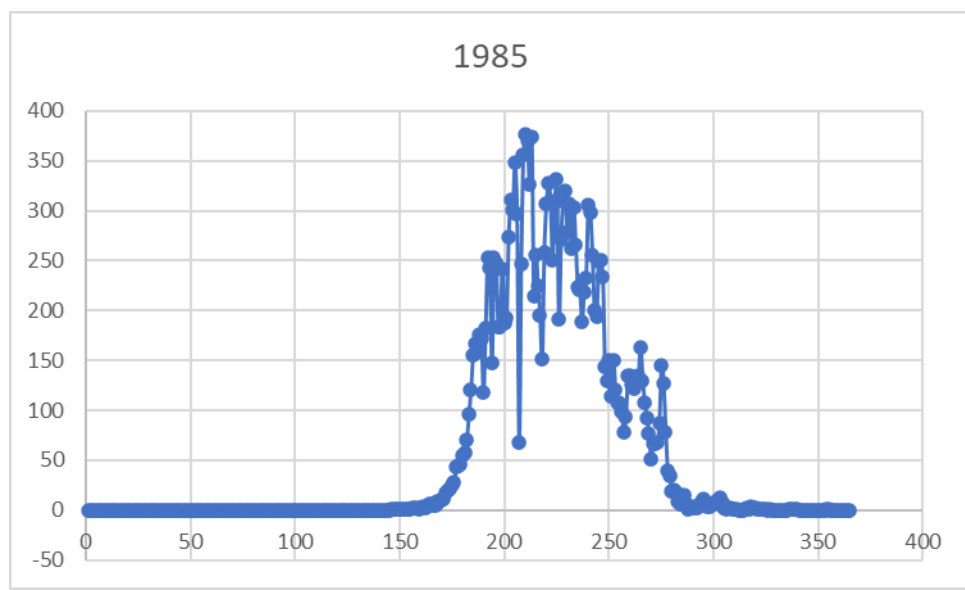

Supplement: Supplementary file [file 30917788]
